# Supplementary material for: Selective inhibition of monoacylglycerol lipase is associated with passive coping behavior and attenuation of stress-induced dopamine release in the medial prefrontal cortex
Source: PubMed Central journal article supplement — Neurobiol Stress. 2021 Jan 9;14:100293. doi: 10.1016/j.ynstr.2021.100293 (PMC7809503; doi:10.1016/j.ynstr.2021.100293), 2021-01-09
Supplement: mmc1.pdf [file mmc1.pdf]

**Figure S1. Histological representation of coronal brain sections (reproduced from Paxinos & Franklin 2001) illustrating the placement of the microdialysis probe in the mPFC of mice.** Dialysate DA and 5-HT levels were examined in the mPFC after a single (i.p.) injection of PF-3845 (3 mg/kg), JZL184 (10mg/kg) or vehicle and an FST session (total  $n=22$ ). Probes were implanted at random in the left or right hemisphere. Lines represent the 2-mm active area of the probe.

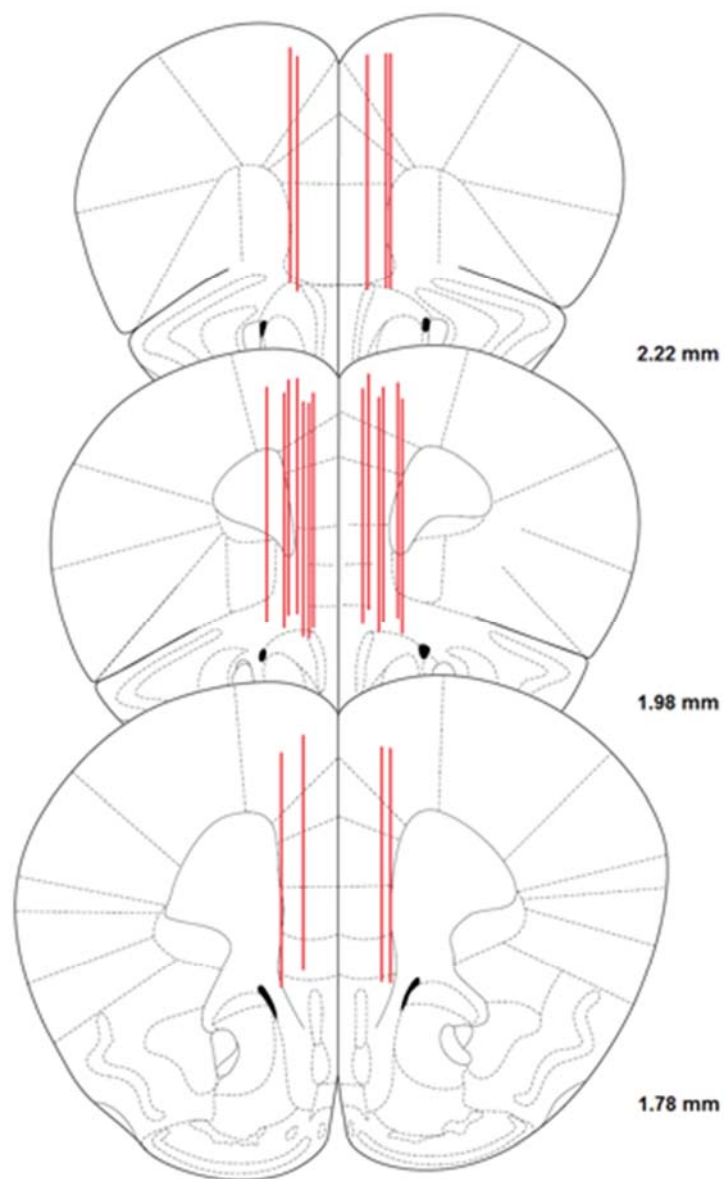

Distances shown are in mm from Bregma (Paxinos and Franklin, 2001)
